# Supplementary material for: Active rock glaciers of the contiguous United States: geographic information system inventory and spatial distribution patterns
Source: Copernicus journal article supplement (doi:10.5194/essd-13-3979-2021), 2021-08-17
Supplement: Supplementary file 1 [file essd-13-3979-2021-supplement.zip]

Archive with 10 entries (9 files):
- PSU_ARGI/
- PSU_ARGI/PSU_ARGI.shp.xml
- PSU_ARGI/PSU_ARGI.dbf
- PSU_ARGI/PSU_ARGI.sbx
- PSU_ARGI/PSU_ARGI.shx
- PSU_ARGI/PSU_ARGI.sbn
- PSU_ARGI/PSU_ARGI.cpg
- PSU_ARGI/PSU_ARGI.prj
- PSU_ARGI/PSU_ARGI.shp
- essd-13-3979-2021-supplement-title-page.pdf
