# Supplementary material for: Active rock glaciers of the contiguous United States: geographic information system inventory and spatial distribution patterns
Source: Copernicus journal article supplement (doi:10.5194/essd-13-3979-2021), 2021-08-17
Supplement: Supplementary file 1 [file essd-13-3979-2021-supplement.zip › essd-13-3979-2021-supplement-title-page.pdf]

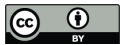

## *Supplement of*

# **Active rock glaciers of the contiguous United States: geographic information system inventory and spatial distribution patterns**

**Gunnar Johnson et al.**

*Correspondence to:* Gunnar Johnson ([alpinebones@gmail.com](mailto:alpinebones@gmail.com))

- [essd-13-3979-2021-supplement-title-page.pdf](#)
- PSU\_ARGI
  - PSU\_ARGI.cpg
  - PSU\_ARGI.dbf
  - PSU\_ARGI.prj
  - PSU\_ARGI.sbn
  - PSU\_ARGI.sbx
  - PSU\_ARGI.shp
  - PSU\_ARGI.shp.xml
  - PSU\_ARGI.shx

The copyright of individual parts of the supplement might differ from the article licence.
