# Supplementary material for: Active rock glaciers of the contiguous United States: geographic information system inventory and spatial distribution patterns
Source: Copernicus journal article supplement (doi:10.5194/essd-13-3979-2021), 2021-08-17
Supplement: Supplementary file 1 [file essd-13-3979-2021-supplement.zip › PSU_ARGI/PSU_ARGI.cpg]

UTF-8
