# Supplementary material for: Active rock glaciers of the contiguous United States: geographic information system inventory and spatial distribution patterns
Source: Copernicus journal article supplement (doi:10.5194/essd-13-3979-2021), 2021-08-17
Supplement: Supplementary file 1 [file essd-13-3979-2021-supplement.zip › PSU_ARGI/PSU_ARGI.prj]

PROJCS["USA_Contiguous_Albers_Equal_Area_Conic_USGS_version",GEOGCS["GCS_North_American_1983",DATUM["D_North_American_1983",SPHEROID["GRS_1980",6378137.0,298.257222101]],PRIMEM["Greenwich",0.0],UNIT["Degree",0.0174532925199433]],PROJECTION["Albers"],PARAMETER["False_Easting",0.0],PARAMETER["False_Northing",0.0],PARAMETER["Central_Meridian",-96.0],PARAMETER["Standard_Parallel_1",29.5],PARAMETER["Standard_Parallel_2",45.5],PARAMETER["Latitude_Of_Origin",23.0],UNIT["Meter",1.0]]
