# Supplementary material for: Active rock glaciers of the contiguous United States: geographic information system inventory and spatial distribution patterns
Source: Copernicus journal article supplement (doi:10.5194/essd-13-3979-2021), 2021-08-17
Supplement: Supplementary file 1 [file essd-13-3979-2021-supplement.zip › PSU_ARGI/PSU_ARGI.shp.xml]

<?xml version="1.0" encoding="UTF-8"?>
<metadata xml:lang="en"><Esri><CreaDate>20210131</CreaDate><CreaTime>17541000</CreaTime><ArcGISFormat>1.0</ArcGISFormat><SyncOnce>TRUE</SyncOnce><DataProperties><lineage><Process ToolSource="c:\program files (x86)\arcgis\desktop10.6\ArcToolbox\Toolboxes\Data Management Tools.tbx\DeleteField" Date="20210131" Time="175348">DeleteField Export_Output_2 RGID;RGID_1</Process></lineage></DataProperties></Esri></metadata>
